# Supplementary material
Source: publisher figshare collection journal article supplement (https://gsapubs.figshare.com/ndownloader/files/23298833)
Supplement: Supplementary file 1 [file 23298833]

## **“Mid-latitude terrestrial climate of East Asia linked to global climate in the Late Cretaceous” (Gao et al.)**

### **Cyclostratigraphy and Age Model of the Examined Section in SK-1**

Age determination for each sample in the examined section is based on cyclostratigraphy combined with magnetostratigraphy (Gradstein et al., 2012; Deng et al., 2013; Wu et al., 2014). Thorium (Th) logging data was used as paleoenvironmental and paleoclimatic proxy to conduct cyclostratigraphy research on the Sifangtai and Mingshui formations of the SK-1 core. Power spectra, evolutionary fast Fourier transform and wavelet analysis results revealed significant meter- to decameter-scale sedimentary cycles. The ratios of the cycle periods in these stratigraphic units are ~20:5:2:1, which were interpreted as Milankovitch cycles of 405 kyr and 100 kyr eccentricity, 38.4 kyr obliquity and 20 kyr precession cycles, respectively (Wu et al., 2014). An astronomical time scale (ATS) is established by tuning the extracted 405 kyr eccentricity cycles to the target curve of the astronomical solution La2010d based on the magnetostratigraphic time framework of the SK-1 core (Laskar et al., 2011; Deng et al., 2013). This new ATS provides precise numerical ages for stratigraphic boundaries, biozones, geological and geophysical events, and can serve as a basis for correlation of strata and events between marine and terrestrial systems. The age of each sample was calibrated with the ATS in this study.

### **Methods of Stable Isotopic Analysis on Paleosol Carbonate**

The paleosol carbonate nodules analyzed in this study were round to subround with a diameter of 0.1–3.5 cm. Micrite dominates microfabric in the carbonate nodules, and sparry calcite is constrained to the cracks, as also characteristic of the pedogenic carbonate analyzed by Huang et al. (2013). Carbonate nodules were powdered using mortar and pestle or drill. Stable carbon and oxygen isotope values of carbonates were obtained at the Stable Isotope Biogeochemistry Laboratory, Stanford University, using a Thermo Finnigan Gasbench and isotope ratios were measured by a Finnigan MAT Delta+ XL mass spectrometer via a Thermo Finnigan ConFlo III unit. Depending on the samples' carbonate content, 300 to 900 µg of sample powder was weighed into sealed vials that were flushed with He gas and reacted with ca. 0.25 ml of phosphoric acid (H<sub>3</sub>PO<sub>4</sub>) for 1 hour at 72°C. External precision (1σ) of oxygen and carbon isotope data is generally <0.1‰, based upon repeated measurements of two internal laboratory standards (calibrated against NBS 18, NBS 19, and LSVEC). Both  $\delta^{13}\text{C}$  and  $\delta^{18}\text{O}$  values are reported relative to VPDB.

### **Soil Respiration Modeling**

Pedogenic carbonate  $\delta^{13}\text{C}$  is predominantly influenced by three factors: atmospheric  $p\text{CO}_2$ , the soil respiration flux and their respective isotopic compositions (Cerling, 1984; Cerling, 1999; Breecker, 2013). Here we briefly summarize the soil respiration modeling methods used in Caves et al. (2014) and improve upon them using a Monte Carlo routine to account for parameter uncertainty. To understand how soil respiration changed during the Late Cretaceous, we start with the CO<sub>2</sub> diffusion equation first defined by Cerling (1984).

$$C_s(z) = \frac{\theta}{D_s} \left( Lz - \frac{z^2}{2} \right) + C_{atm} \quad (1)$$

where  $C_s$  is the concentration of  $CO_2$  in soil ( $g\ C/cm^3$ ),  $L$  is the production depth of  $CO_2$  (cm),  $\theta$  is the soil  $CO_2$  production rate ( $g\ C/cm^3/s$ ), which we treat as constant with depth,  $C_{atm}$  is the concentration of  $CO_2$  in the overlying atmosphere ( $g\ C/cm^3$ ),  $D_s$  is the diffusion coefficient for  $CO_2$  in soil ( $cm^2/s$ ), and  $z$  is depth of the carbonate sampled in the soil (cm). In the case of constant  $\theta$  with depth, soil respiration (SR) equals  $\theta \times L$ .

The first term on the right-hand side of Equation 1 is equivalent to the  $S(z)$  term used in the Cerling (1999) paleobarometer (see Equation 27 in Cerling (1999)). With the appropriate isotopic relations for  $^{13}CO_2$ , as derived by Davidson (1995) and Cerling (1999), the full paleobarometer equation is:

$$C_{atm} = \frac{\theta}{D_s} \left( Lz - \frac{z^2}{2} \right) \left( \frac{\delta_s - 1.0044\delta_\theta - 4.4}{\delta_{atm} - \delta_s} \right) \quad (2)$$

where  $\delta_\theta$  is the  $\delta^{13}C$  of soil-respired  $CO_2$ ;  $\delta_{atm}$  is the  $\delta^{13}C$  of atmospheric  $CO_2$ ;  $\delta_s$  is the  $\delta^{13}C$  of soil  $CO_2$ . Because this  $S(z)$  term contains a production term ( $\theta$ ), our approach is to invert this equation and solve for  $\theta$ , which presumes we know  $C_{atm}$ .

Thus, we first solve for  $\theta$ , and, following Bowen and Beerling (2004) and Caves et al. (2014), correct for the fact that soil respired  $CO_2$  ( $\theta$ ) is produced entirely in the pore space by multiplying by the inverse of porosity ( $\varepsilon$ ). Finally, to convert to a soil respiration flux (SR), we multiply by the production depth ( $L$ ):

$$SR = \frac{1}{\varepsilon} \left[ \frac{D_s C_{atm} (\delta_{atm} - \delta_s)}{\left( Lz - \frac{z^2}{2} \right) (\delta_s - 1.0044\delta_\theta - 4.4)} \right] L \quad (3)$$

To calculate soil respiration through time in the Songliao Basin (Fig. 2G, main text), we use a Monte Carlo routine to account for uncertainties in the above parameters (e.g. Breecker, 2013) (see Table DR2 for a summary of parameter values and uncertainties). First, we use the measured depth of the sampled soil carbonate (Table DR1), and correct for compaction using the “decompaction” transfer function in Huang et al. (2013). We then calculate soil respiration for each sample using the  $\delta^{13}C$  of the sampled soil carbonate (Table DR1). Second, we assign mean values and uncertainties to the remaining parameters in equation 3. We assume soil organic matter  $\delta^{13}C$  is -25‰, similar to values found at the top of the underlying Nenjiang Formation (Song et al., 2013), with a normally distributed standard deviation of 1‰. To estimate  $C_{atm}$ , we use a compilation of paleo-atmospheric  $pCO_2$  estimates from paleosols and stomata (Beerling et al., 2002; Nordt et al., 2002; Ekart et al., 1999; Nordt et al., 2003; Quan et al., 2009). We correct the paleosol-based  $pCO_2$  estimates of Ekart et al., (1999) and Nordt et al., (2002, 2003) by using the lower estimated soil  $pCO_2$  suggested by Breecker et al. (2010). This results in a lowering of estimated Late Cretaceous  $pCO_2$ . We kernel-smooth this  $pCO_2$  data using a 0.25 Ma bandwidth and an Epanechnikov kernel. We linearly interpolate this kernel estimate to the age of the paleosol carbonate measurements. Due to large uncertainty in the  $pCO_2$  data (Fig. 2B), we assume a constant, uniformly-distributed  $\pm 150$  ppm uncertainty on the kernel estimate. For Cretaceous  $\delta_{atm}$ , we assume a constant value of -5‰ based upon Late Cretaceous estimates from Tipple et al. (2010). We do not assign an uncertainty to this value because the uncertainties for this estimate are unknown. To calculate soil  $CO_2$   $\delta^{13}C$  ( $\delta_s$ ), we must also know the temperature of formation to estimate the carbon isotopic fractionation between  $CO_2$  and calcite. For

temperature, we use the recently published mid-latitude sea-surface temperature record (TEX<sub>86</sub><sup>L</sup> proxy) of Linnert et al., (2014). This record comes from a paleo-latitude of ~35 °N, similar to the paleo-latitude of the SK-1 core. We use their published error of  $\pm 4.0$  °C and assume this error is normally distributed around the mean temperature. We then calculate  $\delta_s$  assuming equilibrium fractionation between soil CO<sub>2</sub> and calcite using the fractionation factors compiled in Cerling (1999). Finally, using these estimates, we calculate soil respiration 2,000 times for each kernel estimate and plot the mean value for each sample as well as the error-weighted kernel estimate (thick black line) of the data in Fig. 2G (main text) with a 1 $\sigma$  errors (black dashed line).

### **Other Isotopic Effects on $\delta^{18}\text{O}$**

Besides temperature and precipitation sources, some other factors can also change the pedogenic carbonate  $\delta^{18}\text{O}$  values. The following is a discussion of these effects explaining why they contributed little to our  $\delta^{18}\text{O}$  excursions.

***Latitude and Surface Elevation:*** Precipitation usually has more depleted <sup>18</sup>O composition in regions with higher latitude (Craig, 1961; Rozanski et al., 1993) and higher elevation (Rowley and Garzione, 2007; Chamberlain et al., 2012). In the Late Cretaceous, the latitude of the Songliao Basin was similar to today, as revealed by previous paleomagnetic work (Fang et al., 1990), and mountains east of the Songliao Basin remained tectonic stable (Li et al., 2010). Furthermore, the timescale of our isotopic excursions (~ 1 Myr) is too brief to reflect tectonic shifts driving significant changes in latitude and topography (Brandon et al., 1998; Kent-Corson et al. 2006; Mix et al., 2011). Therefore, these two effects are unlikely to contribute to our isotopic excursions.

***Continentality:*** The inland distance can affect isotopic composition of precipitation because an air mass will become progressively depleted as it rains out (Rozanski et al., 1993). To produce a  $\delta^{18}\text{O}$  excursion in 1‰ magnitude, a change of 500 km (1.5 times the width of Songliao Basin) on the distance from SK-1 to the coast is necessary assuming a gradient of 0.002‰/km (Criss, 1999). Such a large change in distance on such a short-term timescale was unlikely to happen in the Songliao Basin in Late Cretaceous (Wang et al., 2013).

***Evaporation:*** Evaporation of surface waters can have profound affects on the isotopic composition of lake and soil water (Gonfiantini, 1986). Previous studies show the Mg/Ca and Sr/Ca ratios of lacustrine ostracod shells in the same section are low (Chamberlain et al., 2012), which are indicative of a low paleosalinity (Chivas et al., 1993). Also, no typical evaporative minerals were found in middle Mingshui Formation (Gao et al., 2013; Huang et al., 2013). We thus consider evaporation to be a minor effect on our isotopic records.

***Diagenesis:*** The isotope composition of pedogenic carbonates is also sensitive to diagenesis (Morrill and Koch, 2002). Several lines of evidence suggest that diagenetic effects were relatively minor in the samples we studied. First, samples were taken after detailed core observations devoid of obvious cementation or recrystallization. Second, petrographic analyses of carbonate nodules show micritic fabrics and little evidence for diagenetic alteration (Huang et al., 2013). Third, isotopic values of lacustrine ostracods in the same section revealed paleoenvironmental controls rather than diagenetic effects (Chamberlain et al., 2013).

**Table DR1.** Stable isotopic values, depths and modeled soil respiration of paleosol carbonate nodules in SK-1. ATS ages are from Wu et al. (2014). Dp – Depth to paleosol in core; z – uncompacted soil depth corrected for compaction using the “decompaction” transfer function of Huang et al. (2013). Soil production error is  $1\sigma$ .

| Depth<br>(m) | ATS<br>Age<br>(Ma) | $\delta^{13}\text{C}$<br>(‰) | $\delta^{18}\text{O}$<br>(‰) | Data Source        | Dp<br>(cm) | z<br>(cm) | Soil<br>Respiration<br>( $\text{gC/m}^2/\text{year}$ ) |
|--------------|--------------------|------------------------------|------------------------------|--------------------|------------|-----------|--------------------------------------------------------|
| 268.55       | 65.515             | -9.22                        | -7.6                         | This study         | 40         | 41.1      | 547 $\pm$ 406                                          |
| 268.85       | 65.519             | -9.1                         | -8.06                        | This study         | 70         | 71.9      | 376 $\pm$ 285                                          |
| 269          | 65.521             | -9.02                        | -8.21                        | Huang et al., 2013 | 60         | 61.6      | 376 $\pm$ 282                                          |
| 269.25       | 65.523             | -8.79                        | -7.91                        | This study         | 20         | 20.5      | 753 $\pm$ 459                                          |
| 269.35       | 65.525             | -9.31                        | -7.57                        | This study         | 30         | 30.8      | 672 $\pm$ 451                                          |
| 269.85       | 65.53              | -9.78                        | -8.46                        | This study         | 80         | 82.2      | 524 $\pm$ 429                                          |
| 270          | 65.531             | -8.86                        | -7.36                        | Huang et al., 2013 | 35         | 36.0      | 498 $\pm$ 330                                          |
| 271.05       | 65.542             | -8.7                         | -7.2                         | This study         | 70         | 71.9      | 294 $\pm$ 211                                          |
| 271.05       | 65.542             | -11.29                       | -8.72                        | This study         | 70         | 71.9      | 968 $\pm$ 641                                          |
| 287.11       | 65.688             | -9.28                        | -8.83                        | This study         | 45         | 46.3      | 490 $\pm$ 351                                          |
| 289.66       | 65.71              | -9.85                        | -9.3                         | This study         | 50         | 51.5      | 621 $\pm$ 491                                          |
| 289.96       | 65.713             | -9.93                        | -9.31                        | This study         | 80         | 82.4      | 535 $\pm$ 445                                          |
| 292.06       | 65.731             | -9.36                        | -10.58                       | This study         | 70         | 72.1      | 399 $\pm$ 334                                          |
| 292.36       | 65.735             | -7.76                        | -10.22                       | This study         | 100        | 103.0     | 174 $\pm$ 105                                          |
| 292.85       | 65.739             | -8                           | -10.04                       | This study         | 50         | 51.5      | 251 $\pm$ 161                                          |
| 293.49       | 65.744             | -8.99                        | -9.17                        | This study         | 60         | 61.8      | 354 $\pm$ 273                                          |
| 293.89       | 65.748             | -9.36                        | -9.37                        | This study         | 40         | 41.2      | 554 $\pm$ 392                                          |
| 294.69       | 65.754             | -9.46                        | -9.74                        | This study         | 60         | 61.8      | 463 $\pm$ 386                                          |
| 296.94       | 65.778             | -9.34                        | -8.54                        | This study         | 40         | 41.2      | 601 $\pm$ 394                                          |
| 297          | 65.778             | -9.11                        | -7.7                         | Huang et al., 2013 | 30         | 30.9      | 567 $\pm$ 397                                          |
| 297.14       | 65.779             | -8.96                        | -8.6                         | This study         | 20         | 20.6      | 768 $\pm$ 469                                          |
| 297.59       | 65.784             | -10.75                       | -7.63                        | This study         | 65         | 67.0      | 831 $\pm$ 604                                          |
| 298.94       | 65.799             | -8.77                        | -8.99                        | This study         | 75         | 77.3      | 399 $\pm$ 314                                          |
| 299          | 65.799             | -8.93                        | -8.7                         | Huang et al., 2013 | 50         | 51.5      | 289 $\pm$ 211                                          |
| 300          | 65.809             | -8.35                        | -7.71                        | Huang et al., 2013 | 10         | 10.3      | 1079 $\pm$ 549                                         |
| 300.58       | 65.815             | -8.27                        | -8.43                        | This study         | 30         | 30.9      | 421 $\pm$ 253                                          |
| 301          | 65.819             | -8.05                        | -8.61                        | Huang et al., 2013 | 40         | 41.2      | 311 $\pm$ 199                                          |
| 301          | 65.819             | -8                           | -8.72                        | Huang et al., 2013 | 40         | 41.2      | 306 $\pm$ 180                                          |
| 307          | 65.882             | -9.22                        | -8.03                        | Huang et al., 2013 | 40         | 41.2      | 553 $\pm$ 378                                          |
| 307.05       | 65.882             | -9.41                        | -9.24                        | This study         | 45         | 46.4      | 563 $\pm$ 403                                          |
| 308.85       | 65.891             | -8.83                        | -8.79                        | This study         | 25         | 25.8      | 658 $\pm$ 401                                          |
| 309.76       | 65.91              | -7.95                        | -9.33                        | This study         | 70         | 72.2      | 220 $\pm$ 128                                          |
| 310.51       | 65.918             | -7.75                        | -8.6                         | This study         | 40         | 41.3      | 289 $\pm$ 156                                          |

|        |        |       |        |                    |    |      |     |   |     |
|--------|--------|-------|--------|--------------------|----|------|-----|---|-----|
| 310.51 | 65.918 | -8.21 | -8.3   | This study         | 40 | 41.3 | 350 | ± | 220 |
| 311    | 65.923 | -8.27 | -7.58  | Huang et al., 2013 | 40 | 41.3 | 364 | ± | 227 |
| 312    | 65.934 | -8.48 | -8.56  | Huang et al., 2013 | 60 | 61.9 | 304 | ± | 184 |
| 314    | 65.955 | -8.38 | -8.02  | Huang et al., 2013 | 16 | 16.5 | 826 | ± | 440 |
| 314.68 | 65.961 | -6.66 | -8.06  | This study         | 20 | 20.6 | 372 | ± | 168 |
| 315    | 65.965 | -7.14 | -7.3   | Huang et al., 2013 | 20 | 20.6 | 438 | ± | 205 |
| 315    | 65.965 | -8.41 | -7.41  | Huang et al., 2013 | 20 | 20.6 | 710 | ± | 387 |
| 315    | 65.965 | -8.06 | -7.13  | Huang et al., 2013 | 20 | 20.6 | 618 | ± | 320 |
| 315.93 | 65.975 | -6.44 | -8.72  | This study         | 23 | 23.7 | 318 | ± | 137 |
| 316    | 65.977 | -7.57 | -8.59  | Huang et al., 2013 | 30 | 31.0 | 363 | ± | 169 |
| 316    | 65.977 | -8.12 | -7.6   | Huang et al., 2013 | 30 | 31.0 | 456 | ± | 253 |
| 321    | 66.037 | -7.56 | -8.6   | Huang et al., 2013 | 30 | 31.0 | 393 | ± | 200 |
| 335.97 | 66.22  | -8.46 | -9.96  | This study         | 40 | 41.4 | 561 | ± | 330 |
| 336.77 | 66.229 | -8.34 | -8.77  | This study         | 30 | 31.0 | 653 | ± | 338 |
| 339.3  | 66.261 | -8.28 | -9.46  | This study         | 50 | 51.7 | 459 | ± | 266 |
| 342.87 | 66.307 | -8.43 | -11.39 | This study         | 30 | 31.0 | 748 | ± | 394 |
| 344.07 | 66.323 | -7.19 | -11.84 | This study         | 15 | 15.5 | 829 | ± | 349 |
| 349.48 | 66.391 | -6.82 | -10.04 | This study         | 45 | 46.6 | 309 | ± | 114 |
| 366    | 66.598 | -6.95 | -9     | Huang et al., 2013 | 60 | 62.2 | 318 | ± | 135 |
| 387.13 | 66.919 | -7.46 | -11.06 | This study         | 20 | 20.8 | 919 | ± | 357 |
| 403.05 | 67.243 | -8.59 | -8.03  | This study         | 30 | 31.2 | 837 | ± | 440 |
| 406.05 | 67.3   | -8.09 | -9.63  | This study         | 40 | 41.6 | 528 | ± | 286 |
| 408.21 | 67.343 | -6.51 | -10.43 | This study         | 30 | 31.2 | 351 | ± | 141 |
| 416.61 | 67.475 | -7.09 | -10.13 | This study         | 20 | 20.8 | 530 | ± | 240 |
| 430.14 | 67.695 | -6.23 | -9.93  | This study         | 40 | 41.7 | 189 | ± | 87  |
| 442.25 | 67.938 | -6.7  | -11.12 | This study         | 30 | 31.3 | 221 | ± | 125 |
| 445.21 | 68.001 | -6.65 | -8.67  | This study         | 15 | 15.7 | 369 | ± | 209 |
| 450.31 | 68.108 | -6.92 | -8.14  | This study         | 40 | 41.8 | 187 | ± | 114 |
| 462.74 | 68.395 | -6.25 | -12.7  | This study         | 35 | 36.6 | 185 | ± | 92  |
| 463.74 | 68.413 | -6.22 | -8.6   | This study         | 25 | 26.2 | 240 | ± | 112 |
| 466.32 | 68.449 | -6.86 | -8.39  | This study         | 40 | 41.9 | 201 | ± | 102 |
| 470.52 | 68.504 | -8.17 | -8.5   | This study         | 40 | 41.9 | 361 | ± | 223 |
| 470.52 | 68.504 | -7.37 | -8.61  | This study         | 40 | 41.9 | 259 | ± | 136 |
| 473.63 | 68.546 | -6.82 | -9.85  | This study         | 30 | 31.4 | 267 | ± | 128 |
| 476.42 | 68.584 | -8.04 | -8.75  | This study         | 50 | 52.4 | 308 | ± | 193 |
| 476.78 | 68.589 | -7.67 | -9.45  | This study         | 60 | 62.9 | 238 | ± | 138 |
| 477    | 68.592 | -7.51 | -9.52  | Huang et al., 2013 | 30 | 31.4 | 353 | ± | 173 |
| 477.38 | 68.597 | -8.93 | -9.4   | This study         | 45 | 47.1 | 506 | ± | 356 |
| 477.78 | 68.602 | -9.11 | -8.83  | This study         | 85 | 89.1 | 409 | ± | 313 |
| 478    | 68.606 | -7.07 | -9.13  | Huang et al., 2013 | 20 | 21.0 | 444 | ± | 221 |

|        |        |       |        |                    |    |      |      |   |     |
|--------|--------|-------|--------|--------------------|----|------|------|---|-----|
| 478.82 | 68.617 | -9.27 | -9.82  | This study         | 75 | 78.6 | 468  | ± | 362 |
| 479    | 68.619 | -7.33 | -9.31  | Huang et al., 2013 | 35 | 36.7 | 297  | ± | 139 |
| 479    | 68.619 | -7.38 | -8.41  | Huang et al., 2013 | 40 | 41.9 | 279  | ± | 137 |
| 479.3  | 68.622 | -7.15 | -9.1   | This study         | 35 | 36.7 | 283  | ± | 139 |
| 480    | 68.632 | -7.17 | -8.69  | Huang et al., 2013 | 26 | 27.2 | 360  | ± | 177 |
| 480.31 | 68.637 | -6.72 | -9.76  | This study         | 20 | 21.0 | 398  | ± | 186 |
| 483.8  | 68.682 | -6.91 | -9.26  | This study         | 30 | 31.5 | 302  | ± | 139 |
| 484.19 | 68.688 | -8.9  | -10.17 | This study         | 55 | 57.7 | 469  | ± | 345 |
| 485.89 | 68.71  | -7.15 | -7.78  | This study         | 60 | 62.9 | 206  | ± | 105 |
| 497.78 | 68.865 | -6.27 | -12.9  | This study         | 30 | 31.5 | 274  | ± | 111 |
| 499.8  | 68.891 | -6.8  | -8.71  | This study         | 45 | 47.2 | 239  | ± | 98  |
| 500.9  | 68.906 | -6.64 | -8.01  | This study         | 30 | 31.5 | 313  | ± | 127 |
| 503.1  | 68.935 | -7.51 | -9.28  | This study         | 55 | 57.8 | 288  | ± | 152 |
| 503.1  | 68.936 | -7.09 | -7.06  | This study         | 55 | 57.8 | 242  | ± | 108 |
| 506.2  | 68.975 | -6.86 | -9.23  | This study         | 70 | 73.5 | 202  | ± | 83  |
| 507.7  | 68.994 | -9.92 | -11.27 | This study         | 30 | 31.5 | 1209 | ± | 615 |
| 508.2  | 69.001 | -8.03 | -10.91 | This study         | 80 | 84.1 | 311  | ± | 162 |
| 522.61 | 69.179 | -6.17 | -10.68 | This study         | 70 | 73.6 | 191  | ± | 72  |
| 535.71 | 69.347 | -8.25 | -11.65 | This study         | 20 | 21.1 | 935  | ± | 413 |
| 537.91 | 69.374 | -8.57 | -11.77 | This study         | 75 | 79.0 | 456  | ± | 283 |
| 539.1  | 69.39  | -7.88 | -11    | This study         | 70 | 73.8 | 344  | ± | 172 |
| 557.96 | 69.637 | -6.47 | -10.24 | This study         | 30 | 31.7 | 306  | ± | 125 |
| 576.34 | 69.879 | -6.45 | -13.23 | This study         | 20 | 21.1 | 362  | ± | 165 |
| 592.8  | 70.073 | -6.38 | -14.19 | This study         | 55 | 58.2 | 146  | ± | 72  |
| 593.7  | 70.083 | -6.48 | -13.36 | This study         | 30 | 31.8 | 232  | ± | 116 |
| 616.09 | 70.298 | -6.31 | -13.27 | This study         | 15 | 15.9 | 476  | ± | 200 |
| 626.1  | 70.395 | -7.08 | -12.7  | This study         | 35 | 37.2 | 314  | ± | 147 |
| 626.5  | 70.399 | -7.66 | -15.05 | This study         | 30 | 31.9 | 435  | ± | 225 |
| 699.49 | 71.439 | -7.48 | -11.9  | This study         | 50 | 53.4 | 519  | ± | 225 |
| 700.44 | 71.451 | -6.32 | -12.14 | This study         | 30 | 32.1 | 510  | ± | 181 |
| 703.39 | 71.486 | -7.23 | -9.01  | This study         | 20 | 21.4 | 981  | ± | 369 |
| 755.79 | 72.142 | -5.5  | -11.55 | This study         | 15 | 16.1 | 829  | ± | 230 |
| 762.49 | 72.236 | -6.64 | -11.27 | This study         | 25 | 26.9 | 730  | ± | 252 |
| 764.89 | 72.273 | -8.81 | -10.17 | This study         | 45 | 48.4 | 1065 | ± | 497 |
| 770.8  | 72.363 | -8.04 | -13.12 | This study         | 20 | 21.5 | 1410 | ± | 483 |
| 771.33 | 72.372 | -6.63 | -11.81 | This study         | 40 | 43.0 | 503  | ± | 160 |
| 783.94 | 72.557 | -5    | -13.12 | This study         | 10 | 10.8 | 1035 | ± | 266 |
| 812.77 | 72.953 | -7.09 | -11.31 | This study         | 50 | 54.0 | 516  | ± | 194 |
| 868.5  | 73.947 | -6.62 | -13.05 | This study         | 30 | 32.5 | 684  | ± | 222 |
| 887.58 | 74.236 | -5.05 | -13.39 | This study         | 15 | 16.3 | 823  | ± | 211 |

|         |        |       |        |            |    |      |      |   |     |
|---------|--------|-------|--------|------------|----|------|------|---|-----|
| 896.63  | 74.363 | -5.31 | -14.38 | This study | 30 | 32.6 | 496  | ± | 129 |
| 901     | 74.424 | -6.49 | -10.93 | This study | 25 | 27.2 | 812  | ± | 260 |
| 901.2   | 74.427 | -6.26 | -10.27 | This study | 45 | 48.9 | 479  | ± | 147 |
| 902     | 74.438 | -6.18 | -13.7  | This study | 30 | 32.6 | 637  | ± | 199 |
| 902     | 74.438 | -6.12 | -11.61 | This study | 30 | 32.6 | 625  | ± | 191 |
| 963.22  | 75.307 | -5.5  | -11.48 | This study | 30 | 32.8 | 649  | ± | 146 |
| 982.45  | 75.52  | -6.93 | -14.3  | This study | 15 | 16.4 | 1761 | ± | 410 |
| 985.62  | 75.56  | -6.05 | -13.28 | This study | 40 | 43.8 | 609  | ± | 156 |
| 996.28  | 75.7   | -6.04 | -14.57 | This study | 20 | 21.9 | 1016 | ± | 239 |
| 1000.4  | 75.761 | -6.35 | -11.47 | This study | 25 | 27.4 | 901  | ± | 236 |
| 1000.8  | 75.767 | -6.63 | -11.43 | This study | 20 | 21.9 | 1177 | ± | 310 |
| 1001.1  | 75.773 | -6.95 | -11.31 | This study | 50 | 54.8 | 651  | ± | 202 |
| 1005.5  | 75.838 | -6.49 | -11.79 | This study | 15 | 16.4 | 1433 | ± | 368 |
| 1008.13 | 75.878 | -6.54 | -13.18 | This study | 30 | 32.9 | 795  | ± | 219 |
| 1009.13 | 75.893 | -5.97 | -12.11 | This study | 15 | 16.4 | 1217 | ± | 305 |
| 1009.53 | 75.899 | -5.71 | -13.02 | This study | 30 | 32.9 | 621  | ± | 157 |
| 1009.83 | 75.905 | -6.19 | -14.29 | This study | 20 | 21.9 | 998  | ± | 265 |
| 1010.33 | 75.913 | -5.86 | -13.02 | This study | 30 | 32.9 | 644  | ± | 161 |

**Table DR2.** Parameter values and uncertainties used in calculating soil respiration (Eq. 1 and 2)

| Parameter                                                | Value                                                                       | Uncertainty                        |
|----------------------------------------------------------|-----------------------------------------------------------------------------|------------------------------------|
| Porosity ( $\epsilon$ )                                  | 0.45                                                                        | $\pm 0.05^1$                       |
| Tortuosity ( $\rho$ )                                    | 0.6                                                                         | $\pm 0.05^1$                       |
| Diffusion of CO <sub>2</sub> in air ( $D_{\text{air}}$ ) | 0.14 cm <sup>2</sup> /s                                                     | --                                 |
| Diffusion of CO <sub>2</sub> in soil                     | $\rho \times \epsilon \times D_{\text{air}} = 0.0378 \text{ cm}^2/\text{s}$ | --                                 |
| Production Depth (L)                                     | 100 cm                                                                      | --                                 |
| Depth of Sampling (z)                                    | Measured in SK-1 core (Table DR1)                                           | --                                 |
| Atmospheric CO <sub>2</sub> $\delta^{13}\text{C}$        | -5 ‰                                                                        | --                                 |
| Soil organic matter $\delta^{13}\text{C}$                | -26 ‰                                                                       | $\pm 1\text{‰}^1$                  |
| Atmospheric CO <sub>2</sub> ( $C_{\text{atm}}$ )         | From compilation (see text)                                                 | $\pm 150 \text{ ppm}^2$            |
| Temperature                                              | From Linnert et al. (2014)                                                  | $\pm 4.0 \text{ }^\circ\text{C}^1$ |

<sup>1</sup>Uncertainties assumed to be normally-distributed absolute  $1\sigma$ .

<sup>2</sup> $p\text{CO}_2$  uncertainty is assumed to be uniformly-distributed.



## DATA REPOSITORY REFERENCES

- Beerling, D.J., Lomax, B.H., Royer, D.L., Upchurch, G.R., and Kump, L.R., 2002, An atmospheric  $p\text{CO}_2$  reconstruction across the Cretaceous-Tertiary boundary from leaf megafossils: *Proceedings of the National Academy of Sciences*, v. 99, p. 7836-7840.
- Bowen, G.J., and Beerling, D.J., 2004, An integrated model for soil organic carbon and  $\text{CO}_2$ : Implications for paleosol carbonate  $p\text{CO}_2$  paleobarometry: *Global Biogeochemical Cycles*, v. 18, no. GB1027.
- Brandon, M.T., Roden-Tice, M.K., and Garver, J.I., 1998, Late Cenozoic exhumation of the Cascadia accretionary wedge in the Olympic Mountains, northwest Washington State: *Geological Society of America Bulletin*, v. 110, p. 985-1009.
- Breecker, D.O., 2013, Quantifying and understanding the uncertainty of atmospheric  $\text{CO}_2$  concentrations determined from calcic paleosols: *Geochemistry, Geophysics, Geosystems*, v. 14, no. 8, p. 3210-3220, doi: 10.1002/ggge.20189.
- Breecker, D.O., Sharp, Z.D., and McFadden, L.D., 2010, Atmospheric  $\text{CO}_2$  concentrations during ancient greenhouse climates were similar to those predicted for A.D. 2100: *Proceedings of the National Academy of Sciences*, v. 107, no. 2, p. 576-580.
- Caves, J.K., Sjostrom, D.J., Mix, H.T., Winnick, M.J., and Chamberlain, C.P., 2014, Aridification of Central Asia and Uplift of the Altai and Hangay Mountains, Mongolia: Stable Isotope Evidence: *American Journal of Science*, v. 314, p. 1071-1201.
- Cerling, T.E., 1984, The stable isotopic composition of modern soil carbonate and its relationship to climate: *Earth and Planetary Science Letters*, v. 71, no. 2, p. 229-240.
- Cerling, T.E., 1999, Stable carbon isotopes in palaeosol carbonates, *in* Thiry, M. and Simon-Coincon, R. eds., *Palaeoweathering, Palaeosurfaces and Related Continental Deposits*, The International Association of Sedimentologists, p. 43-60.
- Chamberlain, C.P., Mix, H.T., Mulch, A., Hren, M.T., Kent-Corson, M.L., Davis, S.J., Horton, T.W., and Graham, S.A., 2012, The Cenozoic climatic and topographic evolution of the western North American Cordillera: *American Journal of Science*, v. 312, p. 213-262.
- Chamberlain, C.P., Wan, X., Graham, S.A., Carroll, A.R., Doebbert, A.C., Sageman, B.B., Blisniuk, P., Kent-Corson, M.L., Wang, Z., and Wang, C., 2013, Stable isotopic evidence for climate and basin evolution of the Late Cretaceous Songliao basin, China: *Palaeogeography, Palaeoclimatology, Palaeoecology*, v. 385, p. 106-124.
- Chivas, A. R., De Decker, P., Cali, J. A., Chapman, A., Kiss, E., and Shelley, J. M. G., 1993, Coupled stable-isotope and trace-element measurements of lacustrine carbonates as paleoclimatic indicators, *in* Swart, P. K., Lohmann, K. C., McKenzie, J. A., and Savin, S., eds, *Climate Change in Continental Isotopic Records*: Washington, D. C., American Geophysical Union, *Geophysical Monograph* 78, p. 113-121.
- Craig, H., 1961, Isotopic Variations in Meteoric Waters: *Science*, v. 133, p. 1702-1703.
- Criss, R.E., 1999, *Principles of stable isotope distribution*: New York, Oxford University Press, 254 p.
- Davidson, G., 1995, The stable isotopic composition and measurement of carbon in soil  $\text{CO}_2$ : *Geochimica et Cosmochimica Acta*, v. 59, no. 12, p. 2485-2489.
- Deng, C.L., He, H.Y., Pan, Y.X., and Zhu, R.X., 2013, Chronology of the terrestrial Upper Cretaceous in the Songliao Basin, northeast Asia: *Palaeogeography, Palaeoclimatology, Palaeoecology*, v. 385, p. 44-54.

- Ekart, D.D., Cerling, T.E., Montañez, I.P., and Tabor, N.J., 1999, A 400 million year carbon isotope record of pedogenic carbonate: Implications for paleoatmospheric carbon dioxide: *American Journal of Science*, v. 299, no. 10, p. 805–827.
- Fang, D.J., Wang, Z.L., Jin, G.H., Gao, R.Q., Ye, D.Q., Xie, J.L., 1990, Cretaceous magnetostratigraphy in the Songliao Basin, China: *Science in China*, ser. B, v. 33, p. 246–256.
- Gao, Y., Wang, C., Liu, Z., Zhao, B., and Zhang, X., 2013, Clay mineralogy of the middle Mingshui Formation (upper Campanian to lower Maastrichtian) from the SKIn borehole in the Songliao Basin, NE China: Implications for palaeoclimate and provenance: *Palaeogeography, Palaeoclimatology, Palaeoecology*, v. 385, p. 162–170.
- Gonfiantini, R., 1986, Environmental isotopes in lake studies, *in* Fritz, P., and Fontes, J., eds., *Handbook of Environmental Isotope Geochemistry*: New York, Elsevier, v. 2, p. 113–168.
- Gradstein, F.M., Ogg, J.G., Schmitz, M., and Ogg, G., 2012, *The Geologic Time Scale 2012*: Elsevier.
- Huang, C., Retallack, G.J., Wang, C., and Huang, Q., 2013, Paleoatmospheric  $p\text{CO}_2$  fluctuations across the Cretaceous–Tertiary boundary recorded from paleosol carbonates in NE China: *Palaeogeography, Palaeoclimatology, Palaeoecology*, v. 385, p. 95–105.
- Laskar, J., Fienga, A., Gastineau, M., and Manche, H., 2011, La2010: a new orbital solution for the long-term motion of the Earth: *Astronomy & Astrophysics*, v. 532, p. A89.
- Li, X., Gong, G., Yang, X., and Zeng, Q., 2010, Late Cretaceous–Cenozoic exhumation of the Yanji area, northeast China: Constraints from fission-track thermochronology: *Island Arc*, v. 19, p. 120–133.
- Linnert, C., Robinson, S.A., Lees, J.A., Bown, P.R., Pérez-Rodríguez, I., Petrizzo, M.R., Falzoni, F., Littler, K., Arz, J.A., and Russell, E.E., 2014, Evidence for global cooling in the Late Cretaceous: *Nature Communications*, v. 5, doi: 10.1038/ncomms5194.
- Mix, H.T., Mulch, A., Kent-Corson, M.L., and Chamberlain, C.P., 2011, Cenozoic migration of topography in the North American Cordillera: *Geology*, v. 39, p. 87–90.
- Morrill, C., and Koch, P.L., 2002, Elevation or alteration? Evaluation of isotopic constraints on paleoaltitudes surrounding the Eocene Green River Basin: *Geology*, v. 30, p. 151–154.
- Nordt, L., Atchley, S., and Dworkin, S.I., 2002, Paleosol barometer indicates extreme fluctuations in atmospheric  $\text{CO}_2$  across the Cretaceous–Tertiary boundary: *Geology*, v. 30, no. 8, p. 703.
- Nordt, L., Atchley, S., and Dworkin, S., 2003, Terrestrial evidence for two greenhouse events in the latest Cretaceous: *GSA Today*, v. 13, no. 12, p. 4–9.
- Quan, C., Sun, C., Sun, Y., and Sun, G., 2009, High resolution estimates of paleo- $\text{CO}_2$  levels through the Campanian (Late Cretaceous) based on Ginkgo cuticles: *Cretaceous Research*, v. 30, no. 2, p. 424–428, doi: 10.1016/j.cretres.2008.08.004.
- Rowley, D.B., and Garzzone, C.N., 2007, Stable Isotope-Based Paleoaltimetry: *Annual Review of Earth and Planetary Sciences*, v. 35, p. 463–508.
- Rozanski, K., Araguás-Arruás, L., and Gonfiantini, R., 1993, Isotopic patterns in modern global precipitation, *in* Swart, P. K., Lohmann, K. C., McKenzie, J., and Savin, S., ed., *Climate Change in Continental Isotopic Records*: Washington D. C., American Geophysical Union Geophysical Monograph 78, p. 1–36.
- Song, Z., Qin, Y., George, S.C., Wang, L., Guo, J., and Feng, Z., 2013, A biomarker study of depositional paleoenvironments and source inputs for the massive formation of Upper

- Cretaceous lacustrine source rocks in the Songliao Basin, China: *Palaeogeography, Palaeoclimatology, Palaeoecology*, v. 385, p. 137-151.
- Tipple, B.J., Meyers, S.R., and Pagani, M., 2010, Carbon isotope ratio of Cenozoic CO<sub>2</sub>: A comparative evaluation of available geochemical proxies: *Paleoceanography*, v. 25, no. 3, doi: 10.1029/2009PA001851.
- Wang, C., Feng, Z., Zhang, L., Huang, Y., Cao, K., Wang, P., and Zhao, B., 2013, Cretaceous paleogeography and paleoclimate and the setting of SKI borehole sites in Songliao Basin, northeast China: *Palaeogeography, Palaeoclimatology, Palaeoecology*, v. 385, p. 17-30.
- Wu, H.C., Zhang, S.H., Hinnov, L.A., Jiang, G.Q., Yang, T.S., Li, H.Y., Wan, X.Q., and Wang, C.S., 2014, Cyclostratigraphy and orbital tuning of the terrestrial upper Santonian-Lower Danian in Songliao Basin, northeastern China: *Earth and Planetary Science Letters*, v. 407, p. 82-95.
- Zakharov, Y.D., Boriskina, N.G., Ignatyev, A. V., Tanabe, K., Shigeta, Y., Popov, A.M., Afanasyeva, T.B., and Maeda, H., 1999, Palaeotemperature curve for the Late Cretaceous of the northwestern circum-Pacific: *Cretaceous Research*, v. 20, no. 6, p. 685–697, doi: 10.1006/cres.1999.0175.
- Zakharov, Y.D., Shigeta, Y., Popov, A.M., Velivetskaya, T. a., and Afanasyeva, T.B., 2011, Cretaceous climatic oscillations in the Bering area (Alaska and Koryak Upland): Isotopic and palaeontological evidence: *Sedimentary Geology*, v. 235, no. 1-2, p. 122–131, doi: 10.1016/j.sedgeo.2010.03.012.
